# Supplementary material
Source: PubMed Central journal article supplement (PMC7115814)
Supplement: EMS87070-supplement-Supplementary_data.pdf [file EMS87070-supplement-Supplementary_data.pdf]

## Supplementary data

### *Supplementary Materials and Methods*

**Patients and diagnostic evaluations.** A total number of eight patients with chronic myeloid leukemia (CML) (5 females, 3 males) were examined. The median age was 47.3 years (range: 26–59 years). Diagnoses and the phase of CML were established according to the classification provided by the World Health Organization (WHO) [1]. Peripheral blood (PB) and/or bone marrow (BM) cells (iliac crest or sternum) were collected at diagnosis. Karyotyping was performed following the recommendations of the European Leukemia Net (ELN) [5,6]. *BCR/ABL1* mRNA levels were determined in PB or BM cells using *ABL1* as a reference gene and the International Scale (IS) for standardized quantification [7–9]. The patients' characteristics are shown in [Supplementary Table E2](#). All patients examined (8/8 = 100%) had chronic phase CML (CP). The patients provided written informed consent before PB or BM samples were collected. All studies including storage of cells, drug incubation experiments and the examination of leukemic stem cells (LSC) were approved by the local ethics committee of the Medical University of Vienna.

**Cell sampling and storage.** A total number of 8 CML samples (from 8 patients) were analyzed. Stabilizer-free heparin (Biochrom AG, Berlin, Germany) was used as anticoagulant. Freshly obtained samples (PB, BM) were subjected to flow cytometry analysis and isolation of mononuclear cells (MNC) using Ficoll gradient centrifugation. Isolated MNC were either used immediately or were frozen in liquid nitrogen until used. Frozen MNC were thawed using DNase type I, 100 U/mL (Sigma Aldrich, St. Louis, MO, USA) to prevent cell clumping.

**Lentiviral transduction of cell lines.** The coding sequence of human CD26 was cloned into the lentiviral pWPTet vector [10]. pWPTet-green fluorescence protein (GFP) served as a control. VSV-G pseudotyped viral particles were produced as described [11]. KU812 cells were transduced as described and CD26<sup>+</sup> (CD26-transduced) cells and GFP<sup>+</sup> control cells were purified by fluorescence-activated cell sorting (FACS) and cultured in RPMI 1640 medium and 10% fetal calf serum (FCS).

**Flow cytometry analyses.** Phenotyping of CD34<sup>+</sup>/CD38<sup>−</sup> stem cells (SC) and CD34<sup>+</sup>/CD38<sup>+</sup> progenitor cells was performed in eight patients with CML. Whole BM and/or PB samples or MNC were used. Multi-color flow cytometry was performed as described [12,13] using fluorochrome-conjugated mAb shown in [Supplementary Table E1](#). Flow cytometry was performed on a FACSCalibur (Becton Dickinson, San José, CA, USA). All staining reactions were controlled by isotype-matched control antibodies and expressed as percentage of

positive cells. For staining of cytoplasmic caspase-3, KU812 cells or CML-T1 cells were incubated in control medium or in medium supplemented with various concentrations of vildagliptin at 37°C for 48 hours. After incubation, CML cell lines were fixed in 4% formaldehyde (15 minutes) and permeabilized in methanol (-20°C, 15 minutes). Thereafter, CML cells were incubated with PE-conjugated mAb C92-605 against active caspase-3 for 30 minutes. After incubation, cells are analyzed on a FACSCalibur. For analyzing apoptosis induction in primary CML LSC, MNC were incubated in control medium or in medium supplemented with various concentrations of vildagliptin and/or nilotinib at 37°C for 48 hours. After incubation, cells were stained with mAb HI30 against CD45, mAb 581 against CD34 and mAb HIT2 against CD38 (15 minutes). After incubation, cells were washed with annexin-binding buffer (ABB) (Aqua, CaCl<sub>2</sub>, NaCl, Hepes, pH 7.4) and rh Annexin-V was added (15 minutes). Then, cells were resuspended in ABB containing DAPI (100 ng/ml) in order to exclude non-viable cells. Cells were analyzed on a FACSCanto (Becton Dickinson, San José, CA, USA).

**Measurement of <sup>3</sup>H-thymidine uptake in CML cells.** To determine the growth-inhibitory effects of various drugs, KU812 cells transfected with a control construct (GFP<sup>+</sup>) or a CD26 construct (CD26<sup>+</sup>), CD26<sup>+</sup> CML-T1 cells (1–2 × 10<sup>4</sup> cells/well) or primary CML MNC (1–1.5 × 10<sup>5</sup> cells/well) were incubated in control medium or in various concentrations of vildagliptin (10–10,000 nM), imatinib (50–250 nM), or nilotinib (2–12 nM) alone or in combination in 96-well culture plates at 37°C for 48 hours. After incubation, 0.5 μCi <sup>3</sup>H-thymidine was added (37°C, 16 hours). Cells were then harvested on filter membranes (Packard Biosciences, Meriden, CT) in a Filtermate 196 harvester (Packard Bioscience). Filters were air-dried, and the bound radioactivity was counted in a β-counter (Top-count NXT, Packard Bioscience). All experiments were performed in triplicates.

**Determination of DPPiV (CD26) enzymatic activity.** As shown previously, lysates from primary, CD26 sorted CML LSC and CD26 transfected KU812 cells exhibit DPPiV activity, whereas normal stem cells lack CD26 activity [14]. In the present study, DPPiV activity was determined in lysates of KU812 CD26<sup>+</sup> cells, KU812 GFP<sup>+</sup> (CD26<sup>−</sup>) cells, primary CD34<sup>+</sup>/CD38<sup>−</sup>/CD26<sup>+</sup> stem cells and CD34<sup>+</sup>/CD38<sup>−</sup>/CD26<sup>−</sup> (normal) stem cells from one CML patient, and the CD26<sup>+</sup> CML cell line CML-T1. Before being measured, CML-T1 cell lysates were pre-incubated with gliptins (1–1,000 nM) at 37°C for 30 minutes. Enzyme activity was measured by the DPPiV-Glo<sup>TM</sup> protease assay (Promega, Madison, WI, USA) essentially as described [14]. In brief, lysates from 20 × 10<sup>3</sup> cells (50 μL per well) were incubated with DPPiV-Glo reagent plus DPPiV-Glo substrate (50 μL) at room temperature for 30 minutes in white-colored 96-well plates (Nunc, Thermo Fisher Scientific, Roskilde, Denmark). After incubation, luminescence was determined in a FLx 800 Fluorescence

Microplate Reader (BioTek, Winooski, VT, USA). DPPIV enzymatic activity was expressed as relative luminescence/light units (RLU) per well.

**Xenotransplantation assay.** Purified CD34<sup>+</sup> CML cells were re-suspended in 0.15 ml phosphate-buffered saline (PBS) with 2% FCS and 1% penicillin/streptomycin and were injected intravenously (i.v.) into the lateral tail vein of adult NOD SCID-IL-2R $\gamma$ <sup>-/-</sup> (NSG) mice (5 mice per group; 0.5 - 3 x 10<sup>6</sup> cells per mouse). Twenty-four hours prior to injection, mice were irradiated (2.4 Gy). After i.v. injection of CD34<sup>+</sup> CML cells, one group of mice received only solvent (PBS + 10% DMSO) intraperitoneally (i.p.) for 4 weeks (control group), one group vildagliptin (3  $\mu$ mol/mouse/day) via drinking water for 26 weeks; a third group of mice received imatinib (10 mg/kg/day via i.p. injection) for 4 weeks; a fourth group imatinib (10 mg/kg/day via i.p. injection) for 4 weeks plus oral vildagliptin (3  $\mu$ mol/mouse/day) for 26 weeks; a fifth group nilotinib (10 mg/kg/day via i.p. injection) over 4 weeks; and a sixth group nilotinib (10 mg/kg/day via i.p. injection) over 4 weeks plus oral vildagliptin (3  $\mu$ mol/mouse/day) for 26 weeks. Mice were inspected daily and were sacrificed as soon as they developed disease-related or other severe symptoms before 26 weeks. After 26 weeks (from the time of cell-injection) all (remaining) mice were sacrificed. Despite the long observation period, the dropout rate of mice (by unknown causes) was below 10%. BM cell suspensions of NSG mice were obtained by flushing femurs, tibias, and humeri. Human engrafted cells were detected by multicolor flow cytometry using mAb against CD19, CD33, and CD45. TO-PRO3 was used to exclude non-viable cells. CML-repopulation was quantified by multi-color flow cytometry and expressed as percentage CD45<sup>+</sup>/CD33<sup>+</sup> cells of all viable BM cells in the samples. In addition, engraftment of CML cells was quantified by immunohistochemistry of BM sections obtained from pelvic samples of NSG mice (see below).

**Immunohistochemistry (IHC).** Immunohistochemistry was performed on formalin-fixed and paraffin-embedded BM sections obtained from NSG mice (pelvic samples) injected with CD34<sup>+</sup> CML cells and treated with imatinib, nilotinib, vildagliptin or a combination of the TKI and the CD26 blocker. Before staining, BM sections were pretreated by microwave oven. Sections were incubated with a monoclonal antibody (mAb) against human CD45 (clones: 2B11 and PD7/26, dilution 1:50; Dako, Denmark). Antibodies were diluted in 0.05 M Tris-buffered saline (pH 7.5) and 1% bovine serum albumin (Sigma). After washing, slides were incubated with biotinylated anti-mouse IgG supplemented with normal goat serum (both from Vector, Burlingame, CA, USA) for 30 minutes, washed, and exposed to Vectastain ABC KIT (Vector) for 30 min. 3-amino-9-ethyl-carbazole (AEC) was used as the chromogen.

**Quantitative PCR (qPCR).** To confirm CML engraftment in NSG mice after 26 weeks, BCR/ABL1 mRNA levels were

quantified in human cells as described previously [14]. In brief, total RNA was extracted from enriched CD34<sup>+</sup> human cells before injection and from engrafting human cells in NSG mice, using the RNeasy Micro Kit (Qiagen, Hilden, Germany). Pre-treated with DNase (Promega, Madison, WI), cDNA was synthesized using Moloney murine leukemia virus reverse transcriptase (Invitrogen, Carlsbad, CA, USA), random primers, dNTPs (2 mM) (Invitrogen), and RNasin as described [14]. To quantify BCR/ABL1 mRNA levels, qPCR was performed using primers specific for human BCR/ABL1 (huBCR/ABL1-fwd, TCCGCTGACCATCAATAAGGA; huBCR/ABL1-rev, CACTCAGACCTGAGGCTCAA) and human ABL1 (huABL1-fwd, TGTATGATTTTGTGGCCAGTGGAG; huABL1-rev, GCCTAAGACCCGGAGCTTTTCA). qPCR was performed on a 7900HT Fast Real-Time PCR System (Applied Biosystem, Foster City, CA) using iTaq SYBR Green Supermix with ROX (Bio-Rad, Hercules, CA). Human ABL1 served as reference gene.

## References

1. Vardiman JW, Melo J, Baccarani M, et al. Chronic myelogenous leukemia, BCR/ABL1 positive. In: Swerdlow SH, Campo E, Harris NL, et al, editors. WHO Classification of Tumours of Haematopoietic and Lymphoid Tissues, 4th Edition. Lyon, France: IARC Press; 2008. p. 32–37.
2. Sokal JE, Cox EB, Baccarani M, et al. Prognostic discrimination in “good-risk” chronic granulocytic leukemia. *Blood*. 1984;63:789–799.
3. Hasford J, Pffirmann M, Hehlmann R, et al. A new prognostic score for survival of patients with chronic myeloid leukemia treated with interferon alfa. Writing Committee for the Collaborative CML Prognostic Factors Project Group. *J Natl Cancer Inst*. 1998;90:850–858.
4. Hasford J, Baccarani M, Hoffmann V, et al. Predicting complete cytogenetic response and subsequent progression-free survival in 2060 patients with CML on imatinib treatment: the EUTOS score. *Blood*. 2011;118:686–692.
5. Baccarani M, Saglio G, Goldman J, et al; European LeukemiaNet. Evolving concepts in the management of chronic myeloid leukemia: recommendations from an expert panel on behalf of the European LeukemiaNet. *Blood*. 2006;108:1809–1820.
6. Baccarani M, Cortes J, Pane F, et al; European LeukemiaNet. Chronic myeloid leukemia: an update of concepts and management recommendations of European LeukemiaNet. *J Clin Oncol*. 2009;27:6041–6051.
7. Martinelli G, Iacobucci I, Soverini S, et al. Monitoring minimal residual disease and controlling drug resistance in chronic myeloid leukaemia patients in treatment with imatinib as a guide to clinical management. *Hematol Oncol*. 2006;24:196–204.

8. Hughes T, Deininger M, Hochhaus A, et al. Monitoring CML patients responding to treatment with tyrosine kinase inhibitors: review and recommendations for harmonizing current methodology for detecting BCR-ABL transcripts and kinase domain mutations and for expressing results. *Blood*. 2006;108:28–37.
9. Müller MC, Cross NC, Erben P, et al. Harmonization of molecular monitoring of CML therapy in Europe. *Leukemia*. 2009;23:1957–1963.
10. Mayerhofer M, Gleixner KV, Mayerhofer J, et al. Targeting of heat shock protein 32 (Hsp32)/heme oxygenase-1 (HO-1) in leukemic cells in chronic myeloid leukemia: a novel approach to overcome resistance against imatinib. *Blood*. 2008;111:2200–2210.
11. Hoermann G, Cerny-Reiterer S, Herrmann H, et al. Identification of oncostatin M as a JAK2 V617F-dependent amplifier of cytokine production and bone marrow remodeling in myeloproliferative neoplasms. *FASEB J*. 2012;26:894–906.
12. Florian S, Sonneck K, Hauswirth AW, et al. Detection of molecular targets on the surface of CD34+/CD38- stem cells in various myeloid malignancies. *Leuk Lymphoma*. 2006;47:207–222.
13. Herrmann H, Cerny-Reiterer S, Gleixner KV, et al. CD34(+)/CD38(-) stem cells in chronic myeloid leukemia express Siglec-3 (CD33) and are responsive to the CD33-targeting drug gemtuzumab/ozogamicin. *Haematologica*. 2012;97:219–226.
14. Herrmann H, Sadovnik I, Cerny-Reiterer S, et al. Dipeptidylpeptidase IV (CD26) defines leukemic stem cells (LSC) in chronic myeloid leukemia. *Blood*. 2014;123:3951–3962.

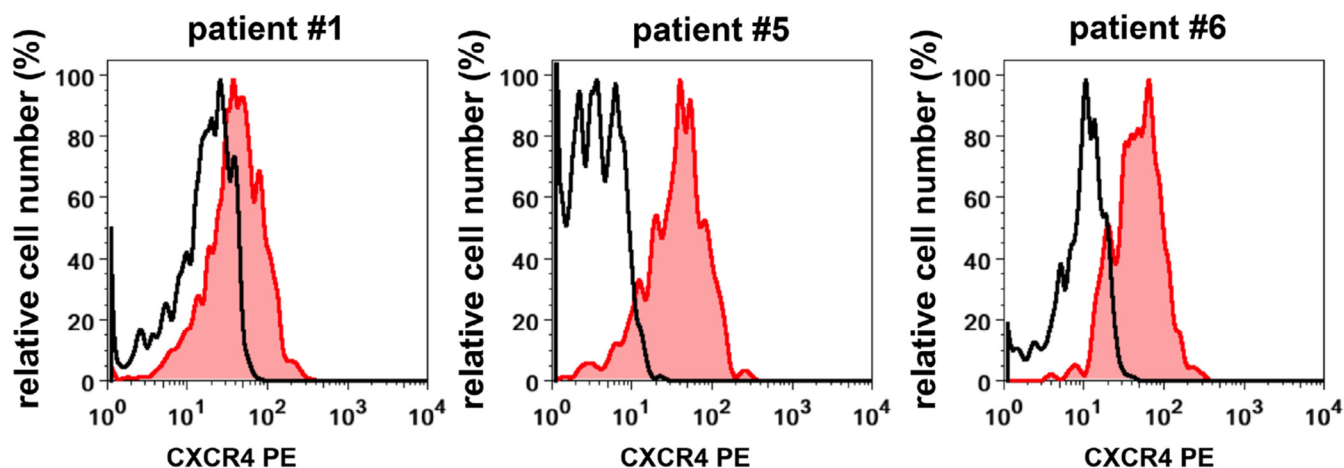

**Supplementary Figure E1.** Expression of SDF-1 receptor CXCR4 (CD184) on CML LSC. In three patients with CML (#1, #5, and #6 in [Supplementary Table E2](#)), leukemic cells were stained with a monoclonal antibody (mAb) against CXCR4; and the reactivity of CD34<sup>+</sup>/CD38<sup>+</sup>/CD26<sup>+</sup> CML stem cells (LSC) with this mAb (red histogram) was determined by multi-color flow cytometry. Reactivity with the isotype-matched control antibody is also shown (open histogram).

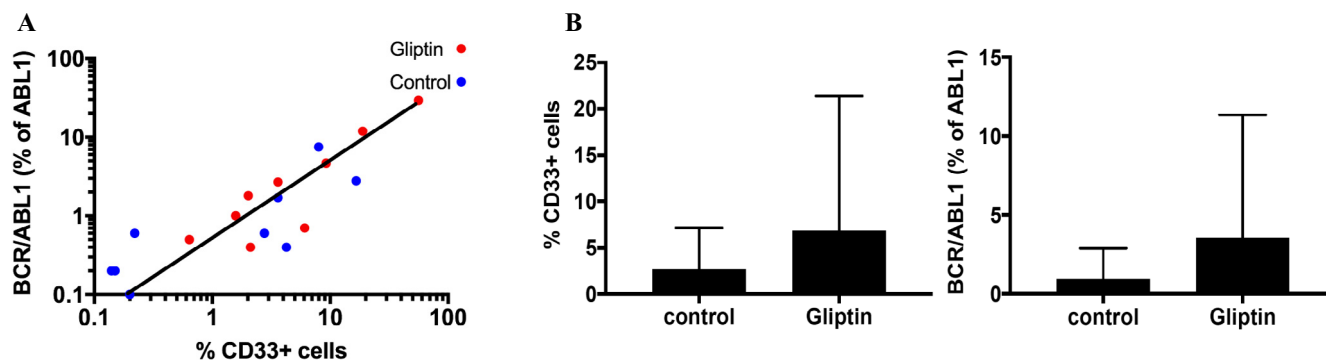

**Supplementary Figure E2.** Engraftment of CD33<sup>+</sup> CML cells in NSG mice receiving vildagliptin. Purified CD34<sup>+</sup> CML cells (chronic phase CML, n = 3) were injected intravenously into NSG mice. Mice were treated with vildagliptin per os (3  $\mu$ mol/mouse/day) or control drinking water for 16 weeks. Then, mice were sacrificed and bone marrow (BM) cells were examined for the presence of human CD33<sup>+</sup> cells, CD19<sup>+</sup> cells and human BCR/ABL1 (as percent of ABL1) by qPCR as described in the text of this supplement. In all three experiments, only CD33<sup>+</sup> cells engrafted. "A": To confirm CML engraftment, BCR/ABL1 mRNA levels were quantified and correlated with the percentage of CD33<sup>+</sup> cells. As visible, a good correlation between BCR/ABL1 mRNA levels and the percentage of CD33<sup>+</sup> cells was demonstrable. In "B" a summary of engraftment levels (percent human CD33<sup>+</sup> cells and BCR/ABL1 levels in BM cells) in all mice treated with solvent control or vildagliptin are shown.

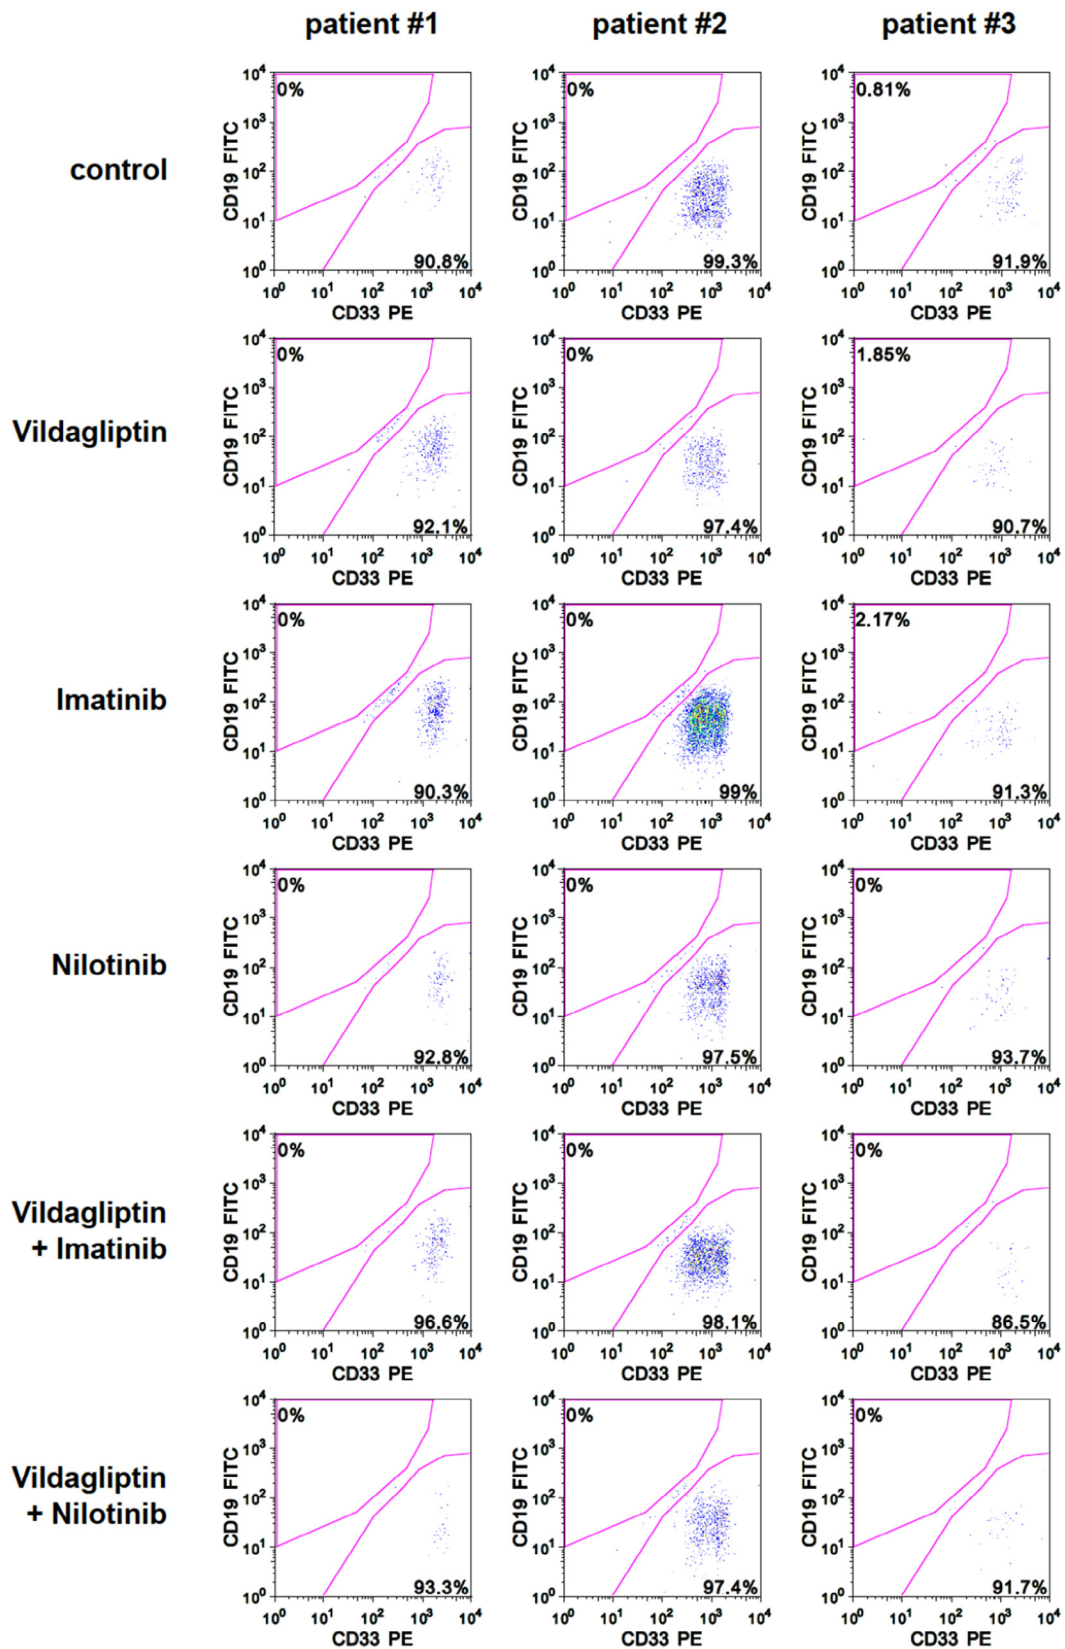

**Supplementary Figure E3.** Expression of CD33 and CD19 on the surface of engrafted cells. Engrafted human cells detected in the bone marrow of NSG mice in the three experiments (#1, #2 and #3 in [Supplementary Table E2](#)) in which mice received solvent control, imatinib, nilotinib, vildagliptin or a combination of either imatinib and vildagliptin or nilotinib and vildagliptin. The figure shows typical staining results obtained in three mice from each group (solvent control, imatinib, nilotinib, vildagliptin or drug combinations). Cells were stained with a mAb against human CD19 and a mAb against human CD33. The reactivity with these mAb was determined by multi-color flow cytometry. As visible, engrafted cells expressed almost exclusively CD33 (86.5–99.3%), whereas no CD19<sup>+</sup> populations of human cells (B cells) could be detected.

**Supplementary Table E1.** Specification of monoclonal antibodies (mAb) used in this study

| CD    | antigen         | clone   | isotype      | conjugate | reactivity | company*       |
|-------|-----------------|---------|--------------|-----------|------------|----------------|
| n.c.  | Isotype control | MOPC-21 | mouse, IgG1  | PE        | human      | BD Biosciences |
| n.c.  | Isotype control | 20102   | mouse IgG2a  | PE        | human      | R&D systems    |
| CD19  | B4              | 4G7     | mouse, IgG1  | FITC      | human      | BD Biosciences |
| CD26  | DPPIV           | M-A261  | mouse, IgG1  | PE        | human      | BD Biosciences |
| CD33  | Siglec-3        | WM53    | mouse, IgG1  | PE        | human      | BD Biosciences |
| CD34  | HPCA-1          | 581     | mouse, IgG1  | FITC      | human      | BD Biosciences |
| CD34  | HPCA-1          | 581     | mouse, IgG1  | PE        | human      | BD Biosciences |
| CD38  | T10             | HIT2    | mouse, IgG1  | APC       | human      | BD Biosciences |
| CD45  | LCA             | 2D1     | mouse, IgG1  | PerCP     | human      | BD Biosciences |
| CD45  | LCA             | HI30    | mouse, IgG1  | APC-H7    | human      | BD Biosciences |
| CD184 | CXCR4           | 12G5    | mouse, IgG2a | PE        | human      | BD Biosciences |
| n.c.  | Caspase-3       | C92-605 | mouse, IgG1  | PE        | human      | BD Biosciences |

CD, cluster of differentiation; PE, phycoerythrin; FITC, fluorescein isothiocyanate; PerCP, peridinin chlorophyll protein; APC, allophycocyanin; n.c., not (yet) clustered; n.a.; not available; Ig, immunoglobulin; DPPIV, dipeptidyl-peptidase IV; HPCA-1, human precursor cell antigen-1; LCA, leukocyte common antigen.

\*Company Location: BD Bioscience, San José, CA, USA; Dako, Glostrup, Denmark; eBioscience, San Diego, CA, USA; R&D Systems, Minneapolis, MN, USA.

**Supplementary Table E2.** Patients' characteristics—chronic myeloid leukemia (CML)

| No | diagnosis | karyotype     | age (yrs) | gender (m/f) | WBC (G/L) | Hb (g/dL) | PLT (G/L) | basophils PB (%) | blasts PB (%) | blasts BM (%) | BCR/ABL1* (%) | CD26 expression on CD34 <sup>+</sup> /CD38 <sup>-</sup> (%) |
|----|-----------|---------------|-----------|--------------|-----------|-----------|-----------|------------------|---------------|---------------|---------------|-------------------------------------------------------------|
| 1  | CML CP    | 46,XX,t(9;22) | 57        | f            | 365.6     | 8.8       | 516       | 5                | 8             | <5            | n.t.          | 64.1                                                        |
| 2  | CML CP    | 46,XX,t(9;22) | 26        | f            | 506.92    | 7.9       | 197       | 3                | 9             | n.t.          | 47.22         | 96.1                                                        |
| 3  | CML CP    | 46,XX,t(9;22) | 56        | f            | 398.94    | 8.6       | 165       | 7                | 1             | 1             | 31.63         | 62.4                                                        |
| 4  | CML CP    | 46,XY,t(9;22) | 50        | m            | 162.20    | 16.4      | 164       | 4                | 2             | <5            | 43.45         | 73.9                                                        |
| 5  | CML CP    | 46,XY,t(9;22) | 59        | m            | 83.73     | 13.5      | 297       | 4                | 2             | 3–4           | 29.99         | 54.8                                                        |
| 6  | CML CP    | 46,XY,t(9;22) | 49        | m            | 232.75    | 9.3       | 1062      | 6                | 3             | 1             | 39.27         | 95.8                                                        |
| 7  | CML CP    | 46,XX,t(9;22) | 46        | f            | 570.5     | 7.5       | 342       | 3                | 1             | 2             | 57.54         | 85.1                                                        |
| 8  | CML CP    | 46,XX,t(9;22) | 35        | f            | 396.93    | 7.2       | 425       | 6                | 2             | 1             | 43.84         | 59.3                                                        |

No, number; yrs, years; m, male; f, female; WBC, white blood count; Hb, hemoglobin; PLT, platelet count; PB, peripheral blood; BM, bone marrow; G/L, 10<sup>9</sup> cells per liter; g/dL, gram per deciliter; CP, chronic phase; n.t., not tested. \*BCR/ABL1 mRNA levels were determined in PB cells using ABL1 as a reference gene and the International Scale (IS) for standardized quantification.
